# Supplementary material for: Change in quality of malnutrition surveys between 1986 and 2015
Source: PubMed Central journal article supplement (PMC5972441; doi:10.1186/s12982-018-0075-9), 2018-05-28

Weight-for-HEIGHT WHO<sub>2006</sub> SD v date, Flags SMART

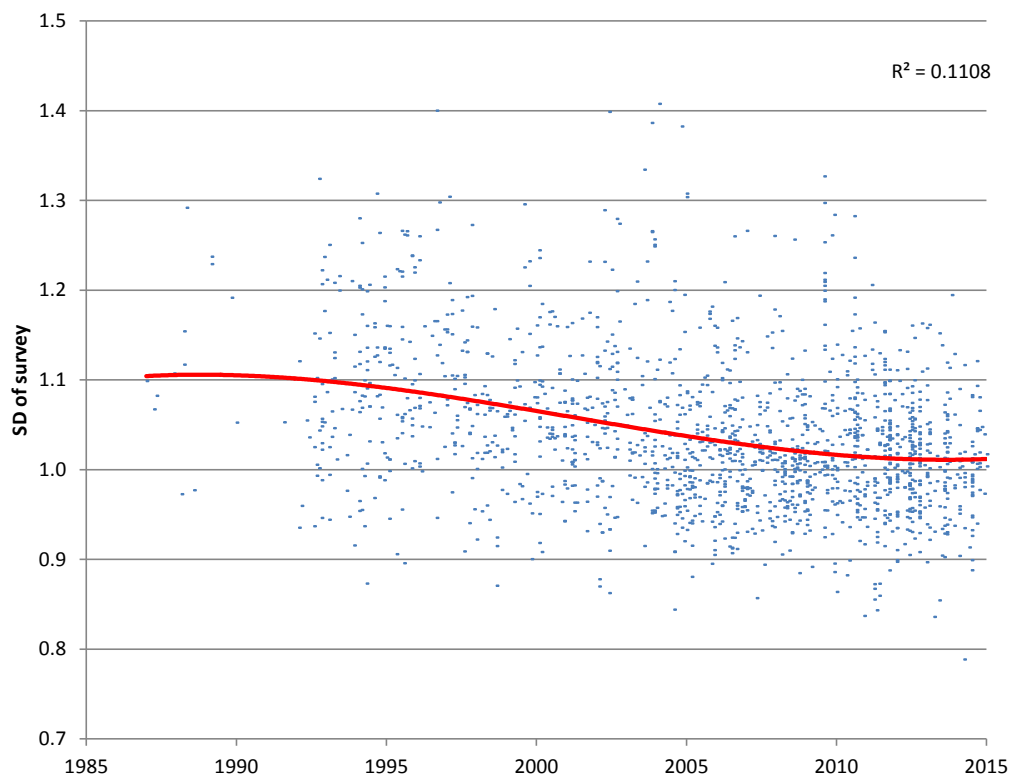

Weight-for-HEIGHT WHO<sub>2006</sub> SD v date Flags, WHO

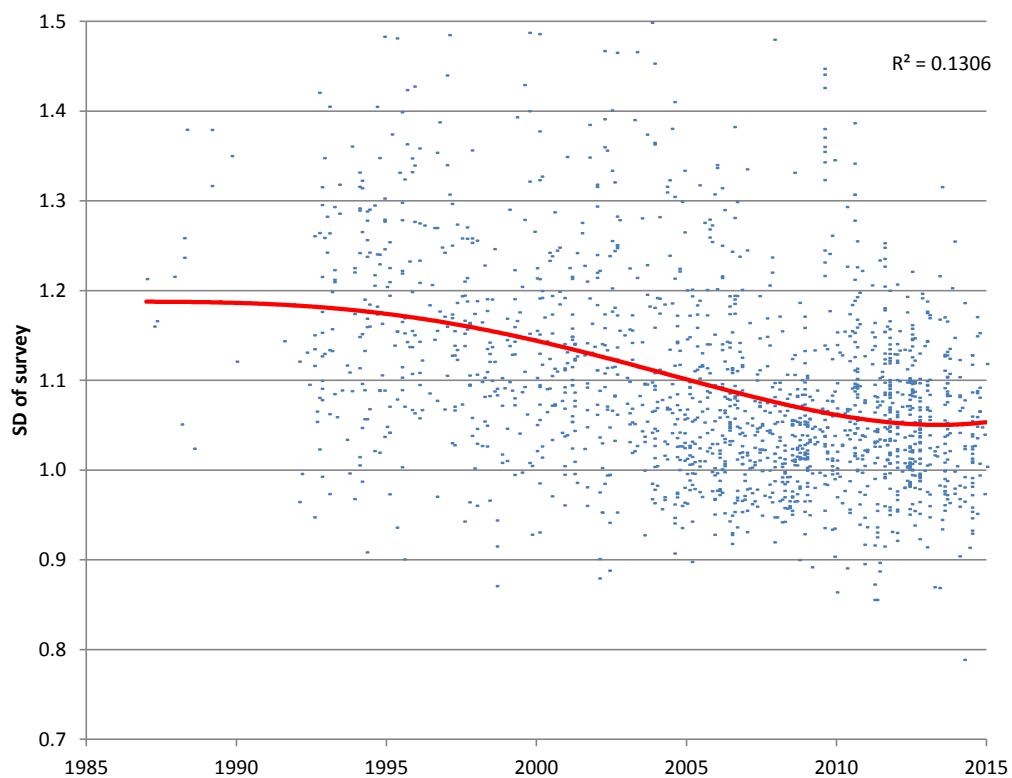

HEIGHT-for-AGE WHO<sub>2006</sub> SD v date, Flags SMART

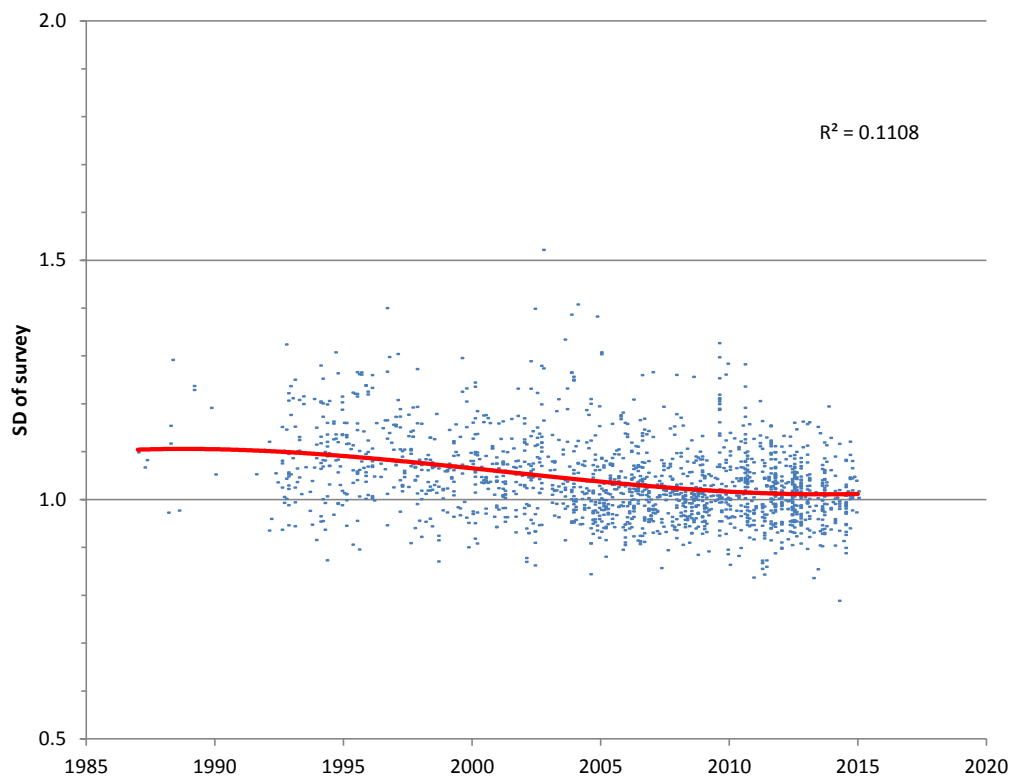

HEIGHT-for-AGE WHO<sub>2006</sub> SD v date, Flags WHO

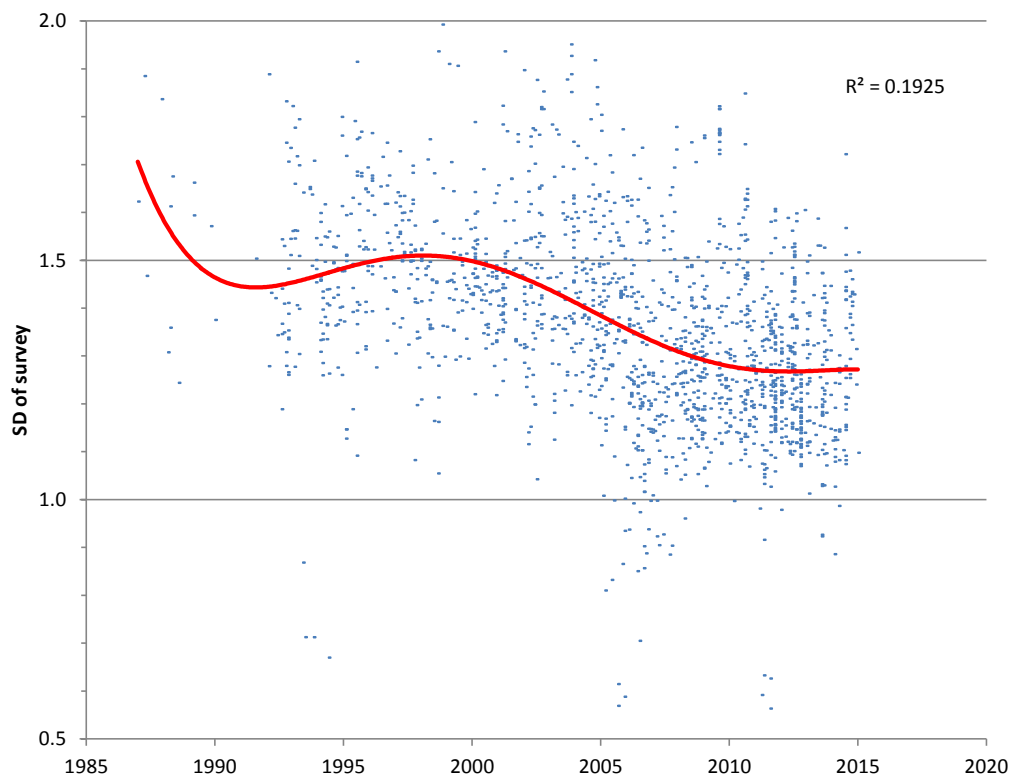

MUAC-for-AGE WHO<sub>2006</sub> SD v date, Flags SMART

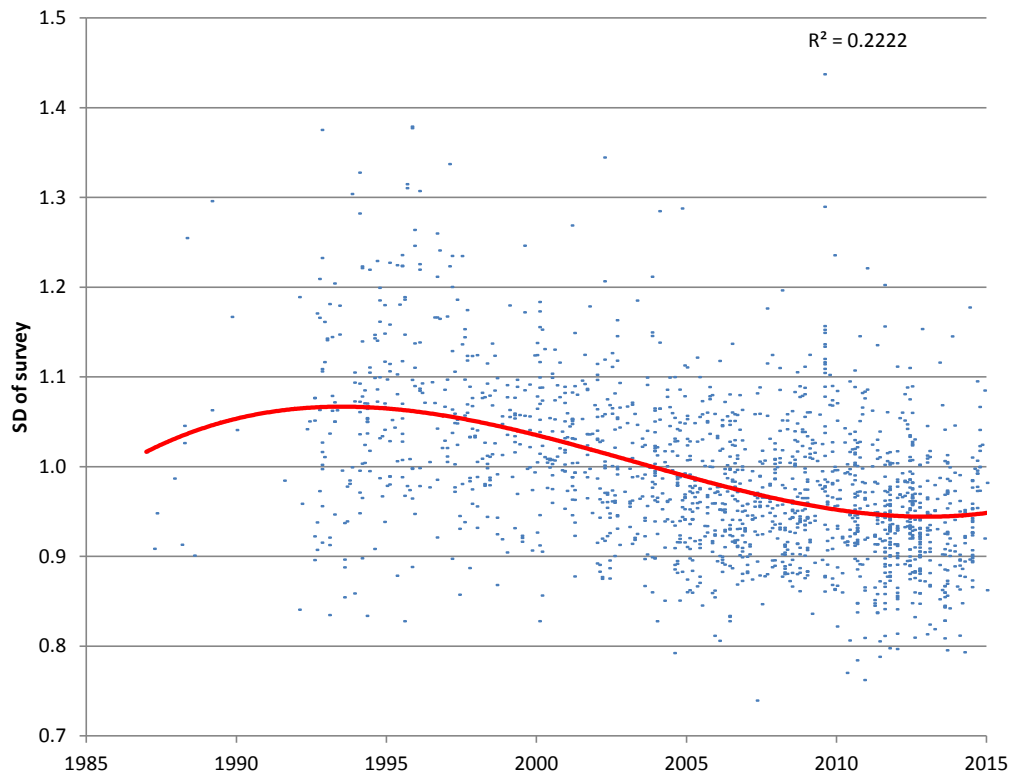

MUAC-for-AGE WHO<sub>2006</sub> SD v date, Flags WHO

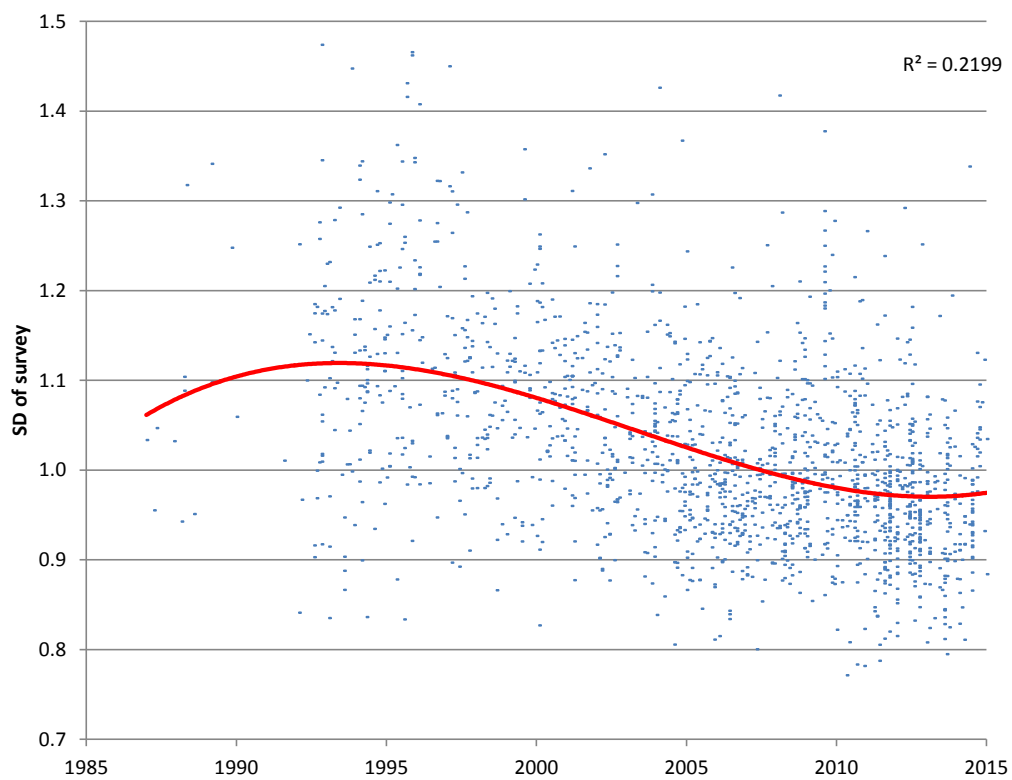

Weight-for-AGE WHO<sub>2006</sub> SD v date, Flags SMART

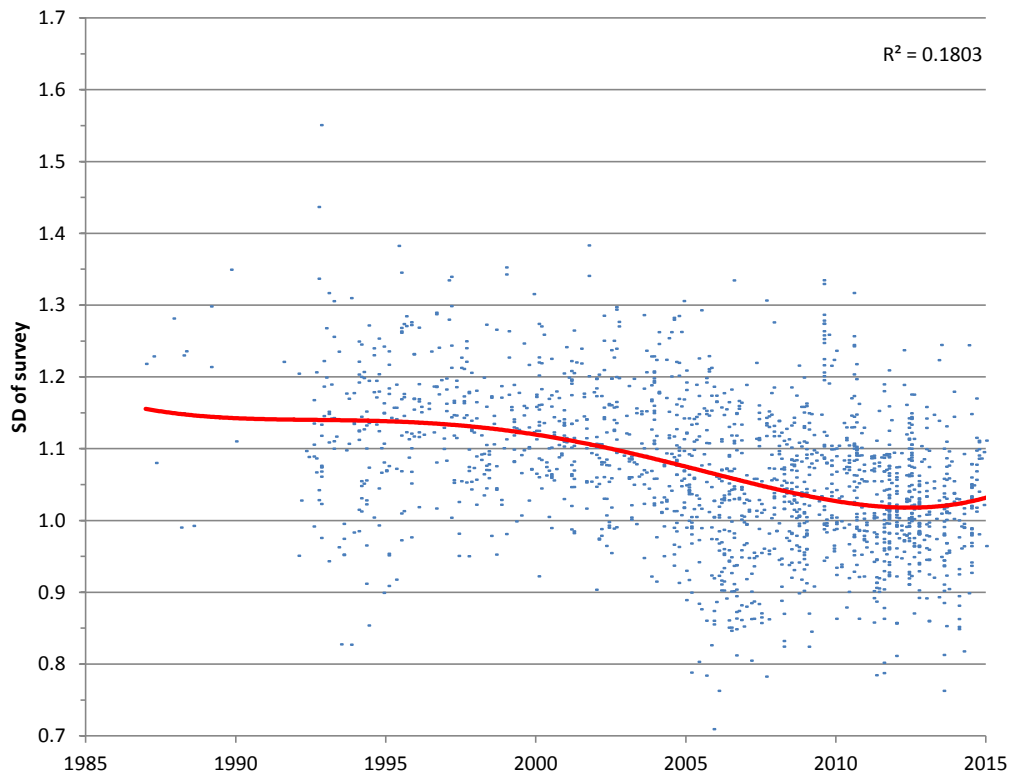

Weight-for-AGE WHO<sub>2006</sub> SD v date, Flags WHO

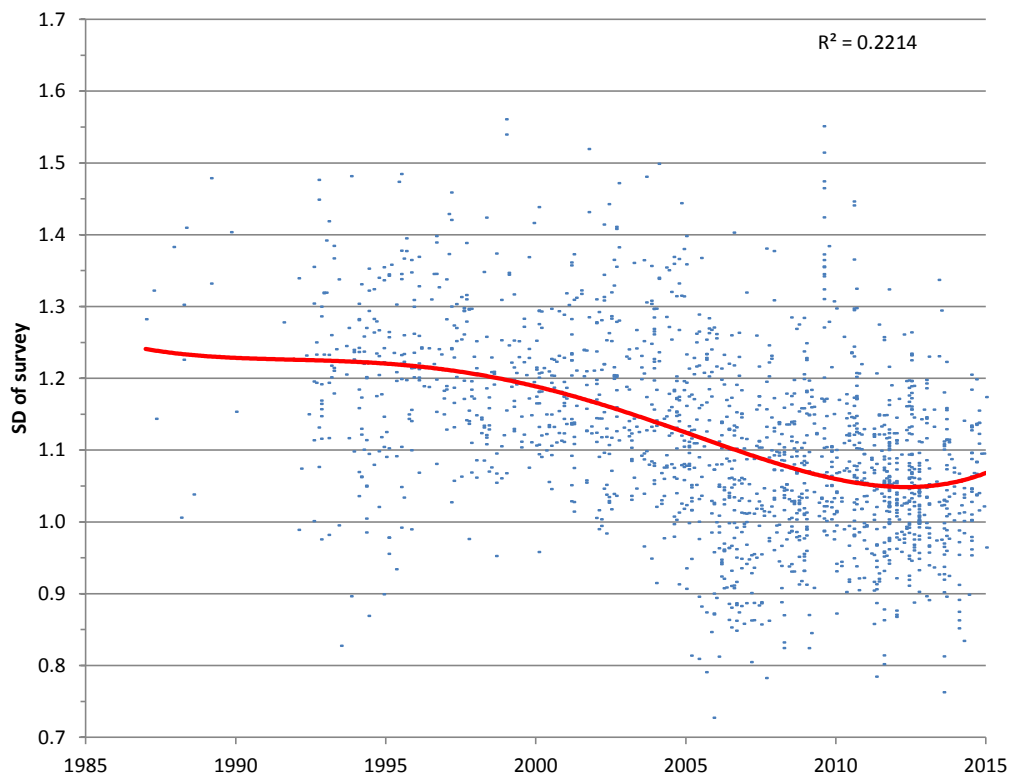

MUAC-for-Height WHO<sub>2006</sub> SD v date, Flags SMART

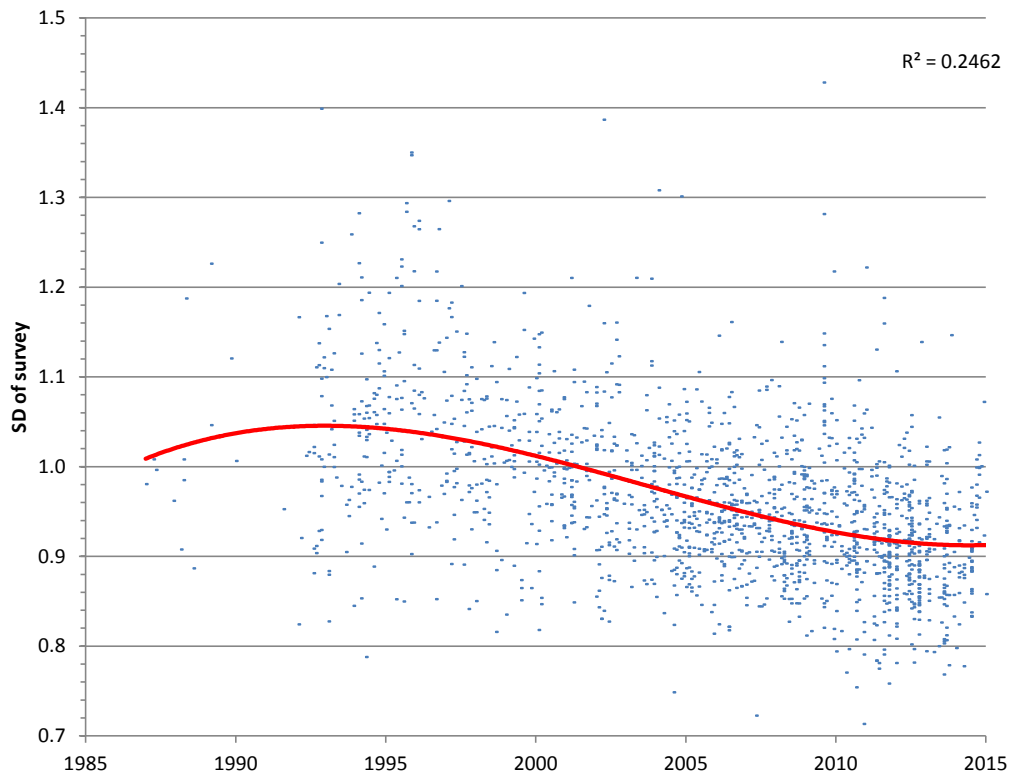

MUAC-for-Height WHO<sub>2006</sub> SD v date, Flags WHO

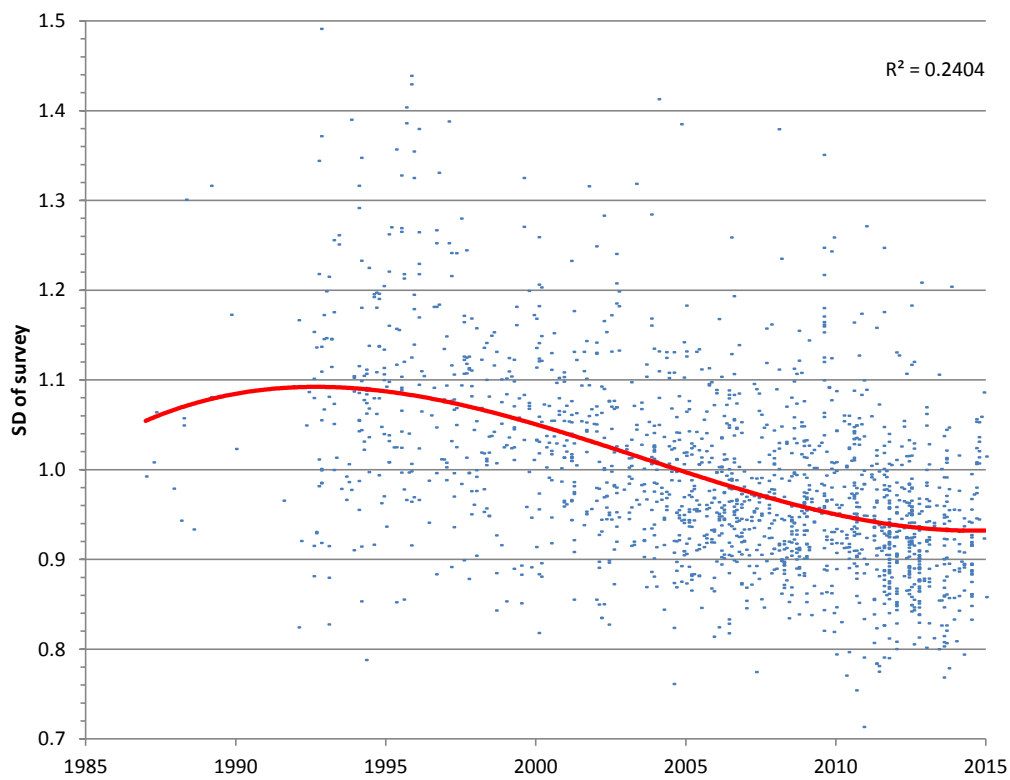

**Absolute MUAC (mm) SD v date, Flags WHO**

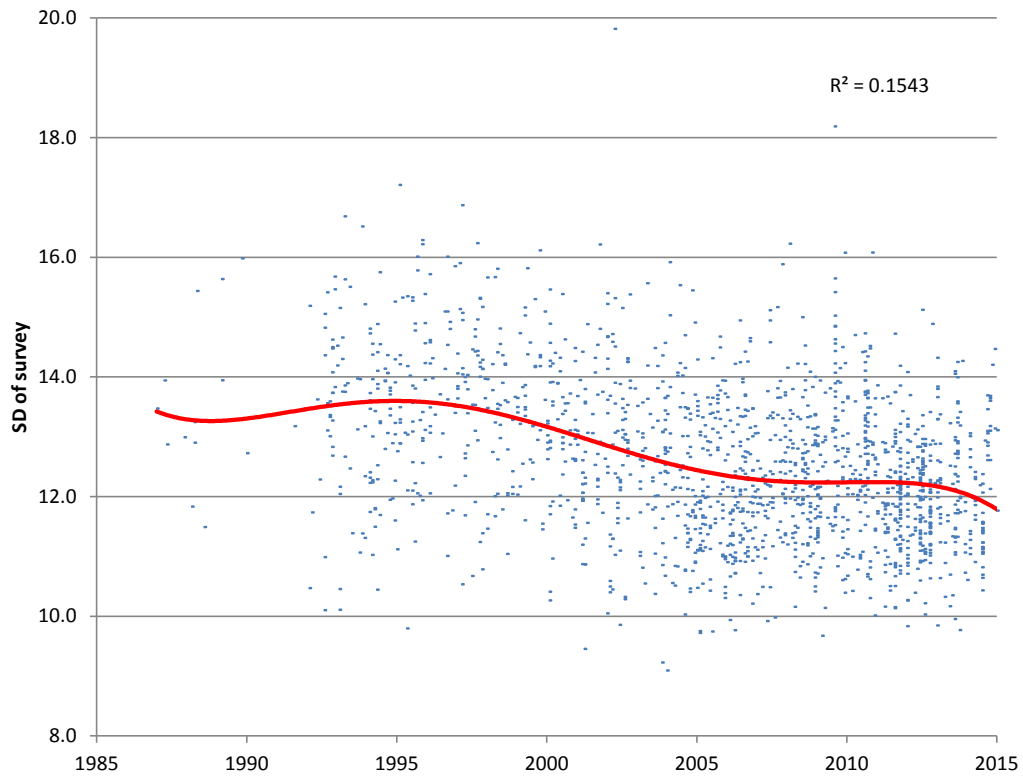

**Absolute AGE (month) SD v date, Flags NONE**

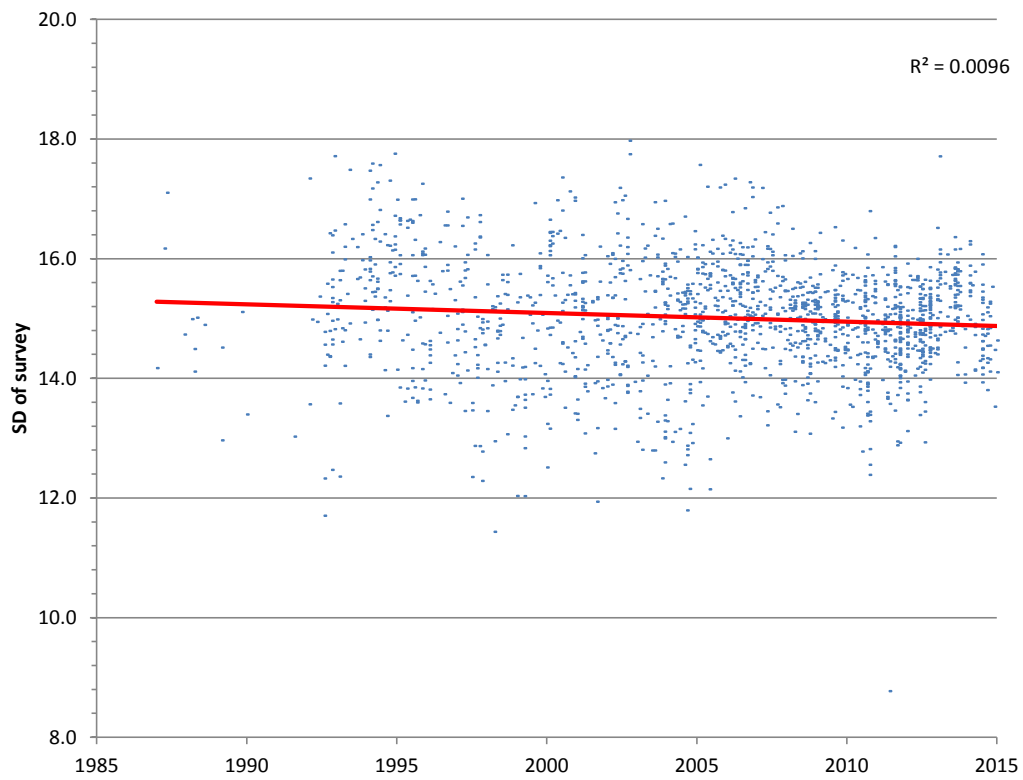

**Absolute WEIGHT (Kg) SD v date, Flags NONE**

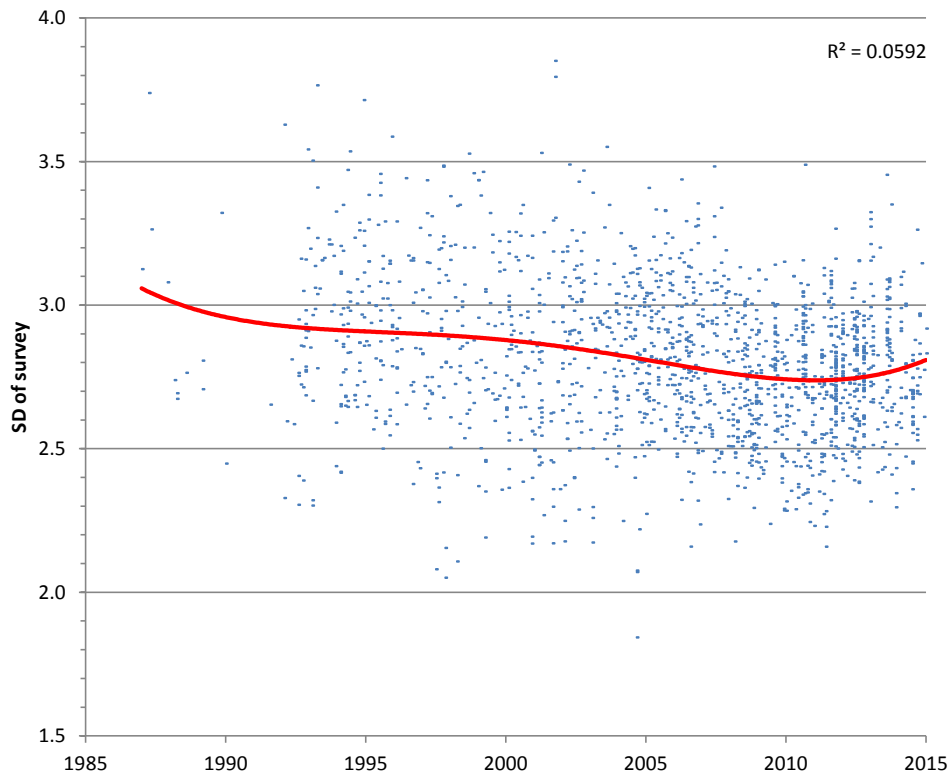

**Absolute HEIGHT (cm) SD v date, Flags NONE**

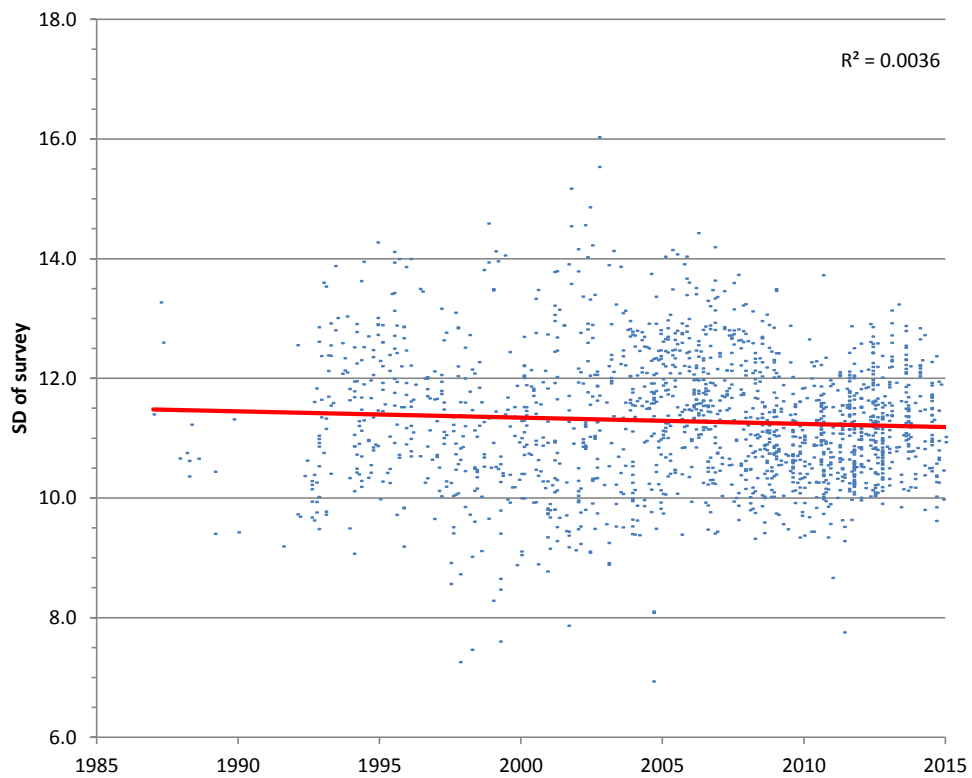

Supplement: 12982_2018_75_MOESM2_ESM.pdf [file 12982_2018_75_MOESM2_ESM.pdf]
